# Supplementary figures and images for: Barriers and facilitators of exercise experienced by cancer survivors: a mixed methods systematic review
Source: Springer Nature journal article supplement (doi:10.1007/s00520-017-3964-5), 2017-11-28

**Supplementary Figure 1. MMAT criteria for quality assessment**


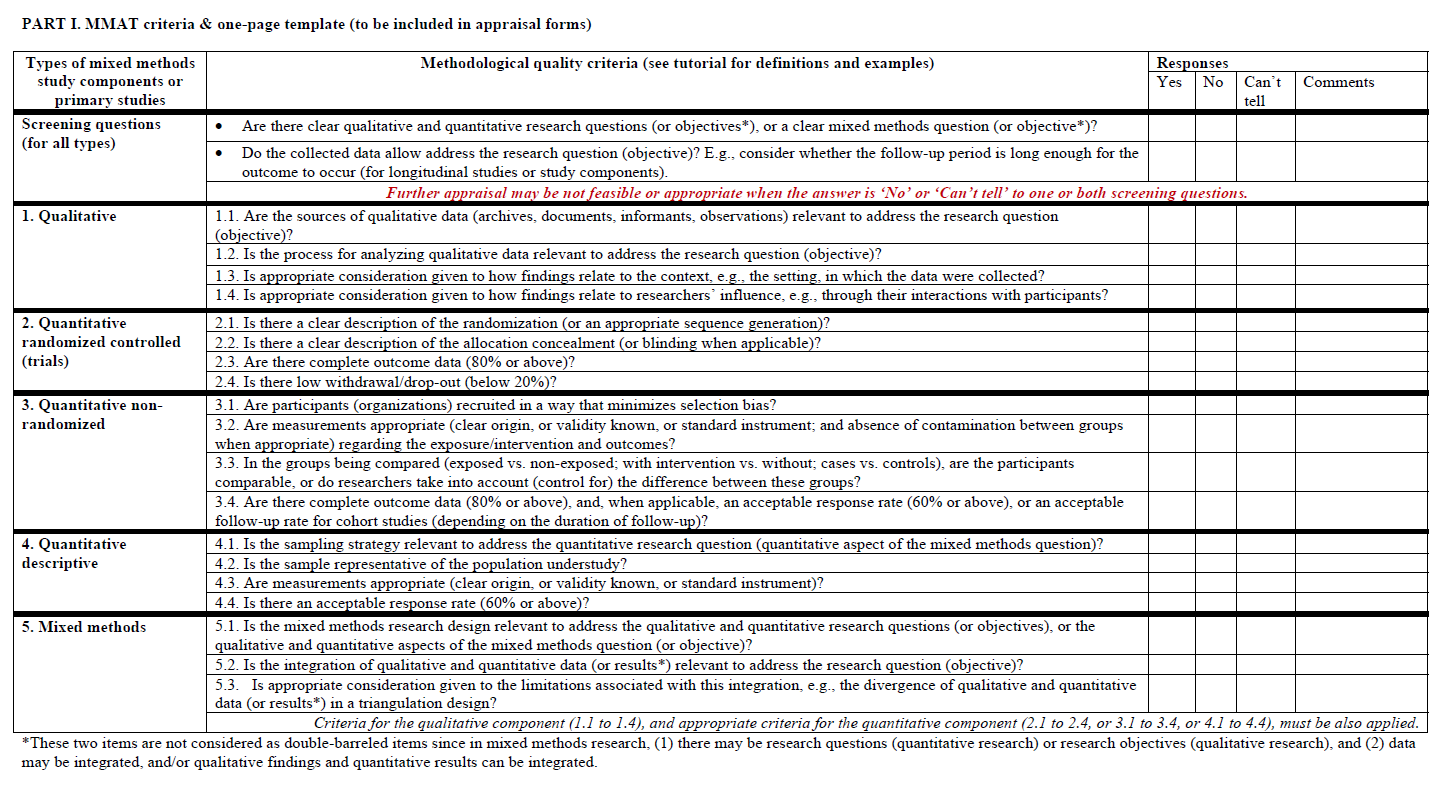

Supplement: MOESM2 [file 15261700]
